- J, Schwartz RN, Soff G, Stein RS, Vlahovic G, Weir AB III: Cancer- and chemotherapy-induced anemia. *J Natl Compr Canc Netw* 2012; 10:628–53
4. Goodnough LT, Nemeth E, Ganz T: Detection, evaluation, and management of iron-restricted erythropoiesis. *Blood* 2010; 116:4754–61
  5. Bierbaum BE, Callaghan JJ, Galante JO, Rubash HE, Tooms RE, Welch RB: An analysis of blood management in patients

having a total hip or knee arthroplasty. *J Bone Joint Surg Am* 1999; 81:2–10

6. Patel MS, Carson JL: Anemia in the preoperative patient. *Med Clin North Am* 2009; 93:1095–104
7. Keel SB, Abkowitz JL: The microcytic red cell and the anemia of inflammation. *N Engl J Med* 2009; 361:1904–6

(Accepted for publication September 24, 2012.)

## ERRATUM

### Patient Blood Management: Erratum

In the article on page 1367 of the June 2012 issue, figure 1 shows “Ferritin 30–100 µg/l and/or TSAT > 20%” and instead should have read “Ferritin 30–100 µg/l and/or TSAT < 20%.” The corrected figure appears below.

The publisher regrets this error.

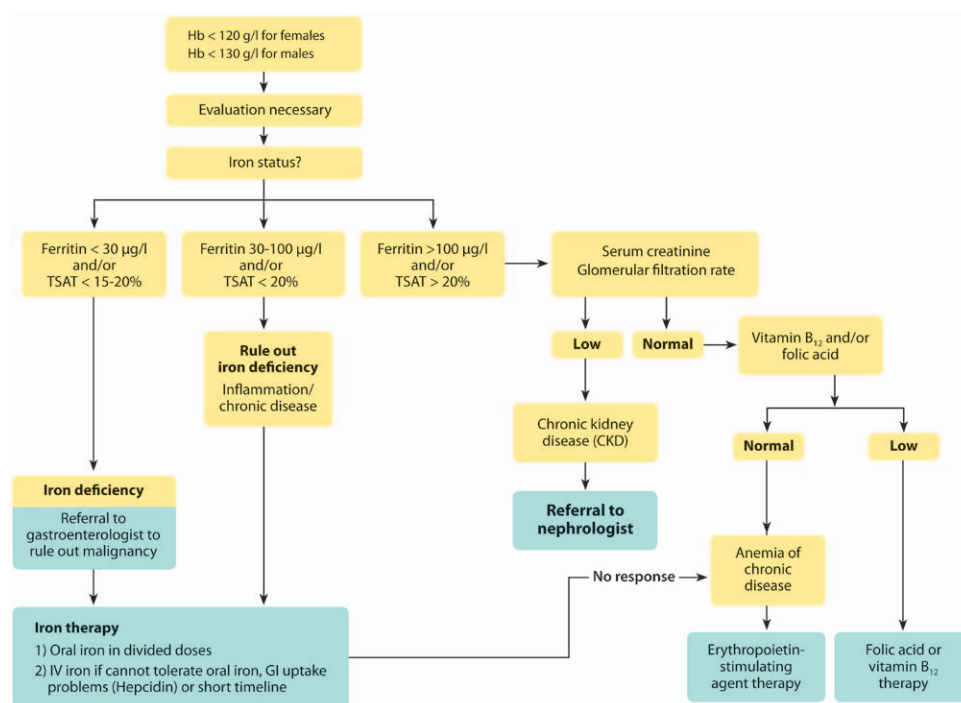

**Fig. 1.** Algorithm for the detection, evaluation, and management of preoperative anemia. SF = serum ferritin; TSAT = transferrin saturation. Modified, with permission, from Goodnough LT. *Br J Anaesth* 2011; 106:13–22.

### Reference

Goodnough LT, Shander A: Patient blood management. *ANESTHESIOLOGY* 2012; 116:1367–76
